# Supplementary material
Source: Springer Nature journal article supplement (https://www.springermedizin.de/resource/supplementary/13054_2010_8825_MOESM3_ESM.pdf/9732656)

# PAC

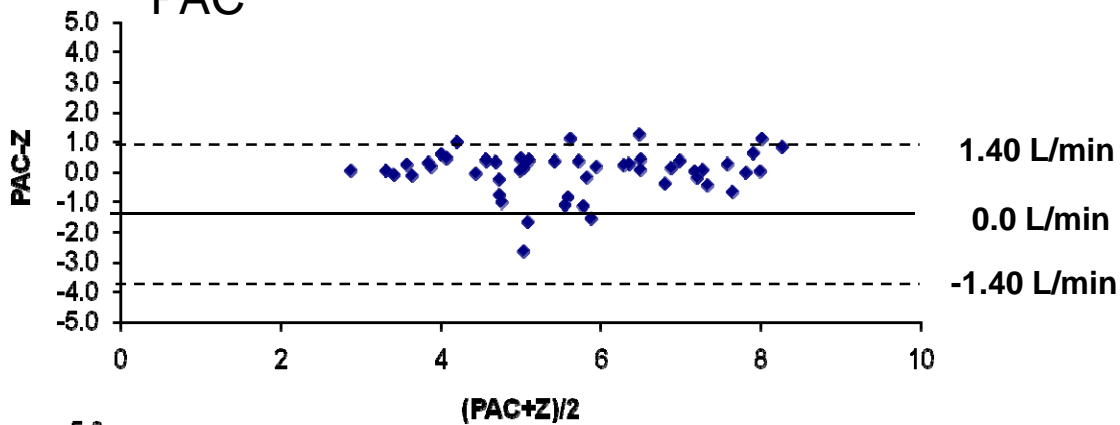

# PiCCO

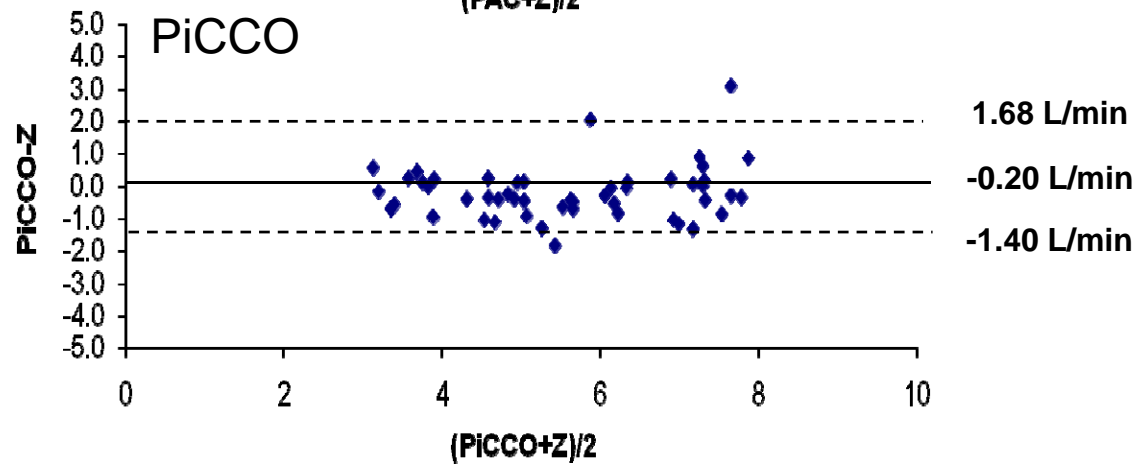

# LiDCO

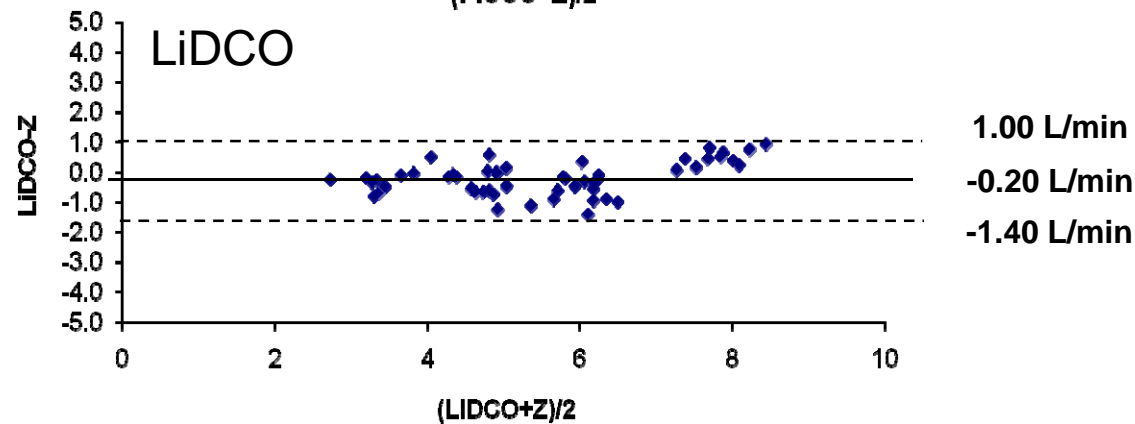

# FloTrac

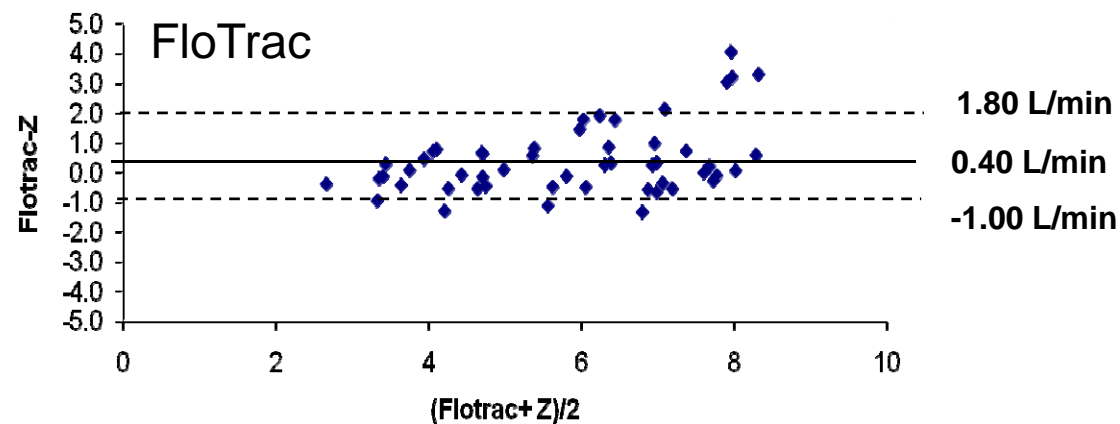

Supplement: MOESM3 [file 9732656]
